# Supplementary material for: Biophysical cartography of the native and human-engineered antibody landscapes quantifies the plasticity of antibody developability
Source: PubMed Central journal article supplement — Commun Biol. 2024 Jul 31;7:922. doi: 10.1038/s42003-024-06561-3 (PMC11291509; doi:10.1038/s42003-024-06561-3), 2024-07-31
Supplement: 42003_2024_6561_MOESM3_ESM.pdf [file 42003_2024_6561_MOESM3_ESM.pdf]

## Description of Additional Supplementary Files

**File name:** Supplementary Data 1

**Description:** Sequence and structure developability parameters.

**File name:** Supplementary Data 2

**Description:** Primers used for the generation of human IgD, IgK and IgL Fv sequences.
